# Supplementary material for: RNA-sequence data normalization through in silico prediction of reference genes: the bacterial response to DNA damage as case study
Source: Springer Nature journal article supplement (doi:10.1186/s13040-017-0150-8), 2017-09-05

| 0/30/90     | 0/30        | 0/90        | 30/90       |
|-------------|-------------|-------------|-------------|
| <b>cysG</b> | <i>acrA</i> | <i>alsR</i> | <i>betT</i> |
| <i>dnaG</i> | <i>asnC</i> | <i>aroK</i> | <i>ccmA</i> |
| <i>dtpB</i> | <i>cof</i>  | <i>atpA</i> | <i>chbC</i> |
| <i>ftsX</i> | <b>cysG</b> | <i>crfC</i> | <i>crp</i>  |
| <i>ftsY</i> | <i>envZ</i> | <i>cyoC</i> | <b>cysG</b> |
| <i>glyY</i> | <i>fadL</i> | <b>cysG</b> | <i>dtpB</i> |
| <i>gyrB</i> | <i>fbp</i>  | <i>eno</i>  | <i>efp</i>  |
| <b>hcaT</b> | <i>fmt</i>  | <i>exuR</i> | <i>fabF</i> |
| <b>idnT</b> | <i>gatA</i> | <i>fecC</i> | <i>fbp</i>  |
| <b>ihfB</b> | <i>gatY</i> | <i>fimA</i> | <i>ftsX</i> |
| <i>lhr</i>  | <i>glyY</i> | <i>fimH</i> | <i>gatZ</i> |
| <i>mutM</i> | <b>hcaT</b> | <i>focA</i> | <i>gcvA</i> |
| <i>mutY</i> | <i>hldD</i> | <i>ftsY</i> | <i>gshB</i> |
| <i>ndk</i>  | <i>hyfA</i> | <i>gatZ</i> | <b>hcaT</b> |
| <i>nfuA</i> | <b>idnT</b> | <i>gnd</i>  | <i>lcd</i>  |
| <i>pnp</i>  | <b>ihfB</b> | <i>gss</i>  | <b>idnT</b> |
| <i>rbbA</i> | <i>ileT</i> | <b>hcaT</b> | <b>ihfB</b> |
| <i>rhsB</i> | <i>insG</i> | <i>Hcr</i>  | <i>infB</i> |
| <i>rpsU</i> | <i>kdpB</i> | <i>hokB</i> | <i>melA</i> |
| <b>rrsA</b> | <i>lpxC</i> | <b>idnT</b> | <i>ompR</i> |
| <i>rrsE</i> | <i>miaC</i> | <b>ihfB</b> | <i>paaF</i> |
| <i>rrsG</i> | <i>mltD</i> | <i>intA</i> | <i>pgaC</i> |
| <i>secB</i> | <i>nagC</i> | <i>iscX</i> | <i>pgk</i>  |
| <i>spoT</i> | <i>ndk</i>  | <i>leuW</i> | <i>pnp</i>  |
| <b>ssrA</b> | <i>nfuA</i> | <i>mutM</i> | <i>prfB</i> |
| <i>tfaR</i> | <i>nrdD</i> | <i>mutY</i> | <i>priB</i> |
| <i>thrW</i> | <i>nrdR</i> | <i>nanC</i> | <i>rho</i>  |
| <i>valS</i> | <i>nudF</i> | <i>ogrK</i> | <i>rhsB</i> |
| <i>yedJ</i> | <i>pepD</i> | <i>oppB</i> | <i>rlmJ</i> |
| <i>ynaE</i> | <i>pgk</i>  | <i>pabC</i> | <i>rpiA</i> |
| <i>yphG</i> | <i>plsB</i> | <i>pfkA</i> | <i>rplJ</i> |
| <i>zntA</i> | <i>rhaM</i> | <i>pldA</i> | <i>rplN</i> |
| <i>zupT</i> | <i>rho</i>  | <i>prmB</i> | <i>rpoA</i> |
|             | <i>rhsB</i> | <i>qorB</i> | <i>rrlB</i> |
|             | <i>rpiA</i> | <i>rhsB</i> | <b>rrsA</b> |
|             | <i>rpsF</i> | <b>rrsA</b> | <i>speF</i> |
|             | <i>rpsG</i> | <i>rrsG</i> | <b>ssrA</b> |
|             | <i>rpsO</i> | <i>rzpQ</i> | <i>surA</i> |
|             | <b>rrsA</b> | <i>sdsR</i> | <i>tfaR</i> |
|             | <i>rrsC</i> | <i>sodA</i> | <i>thiF</i> |
|             | <i>rrsE</i> | <i>speA</i> | <i>tisB</i> |
|             | <i>rutF</i> | <b>ssrA</b> | <i>tyrS</i> |
|             | <i>sdaA</i> | <i>ssuD</i> | <i>uspA</i> |
|             | <b>ssrA</b> | <i>tolC</i> | <i>uvrA</i> |
|             | <i>tfaR</i> | <i>yctZ</i> | <i>waaQ</i> |
|             | <i>trmA</i> | <i>ydeN</i> | <i>yaeF</i> |
|             | <i>valS</i> | <i>ydiQ</i> | <i>ybhH</i> |
|             | <i>ydhK</i> | <i>ydjY</i> | <i>ybjL</i> |
|             | <i>yeaW</i> | <i>yejK</i> | <i>yeaC</i> |
|             | <i>yfbT</i> | <i>ygiB</i> | <i>yeaX</i> |
|             | <i>yfcC</i> | <i>yheS</i> | <i>yfeX</i> |
|             | <i>ygfB</i> | <i>yhhJ</i> | <i>yhil</i> |
|             | <i>yhfK</i> | <i>zupT</i> | <i>yjjK</i> |
|             | <i>yidB</i> |             | <i>ynaE</i> |
|             | <i>yifB</i> |             | <i>ypdC</i> |
|             | <i>yigA</i> |             | <i>ypdE</i> |
|             | <i>ynaE</i> |             | <i>yrbL</i> |
|             |             |             | <i>yrdD</i> |
| <b>33</b>   | <b>57</b>   | <b>53</b>   | <b>58</b>   |

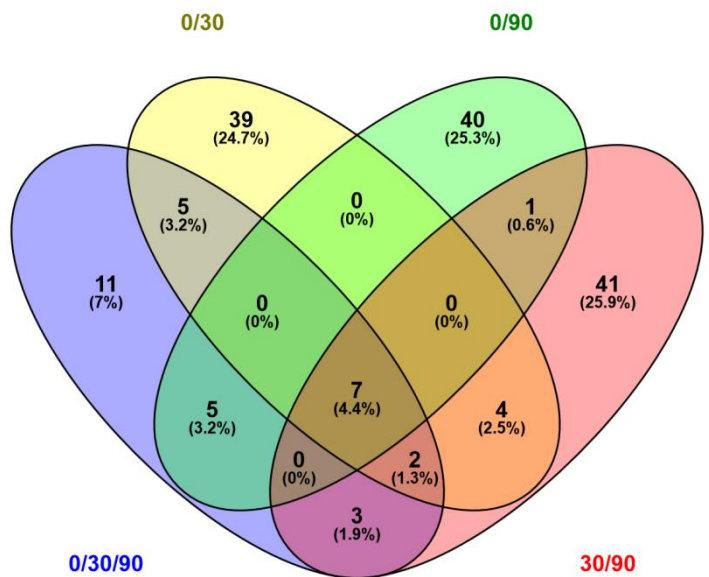

Supplement: 13040_2017_150_MOESM8_ESM.pdf [file 13040_2017_150_MOESM8_ESM.pdf]
