# Supplementary material for: RNA-sequence data normalization through in silico prediction of reference genes: the bacterial response to DNA damage as case study
Source: Springer Nature journal article supplement (doi:10.1186/s13040-017-0150-8), 2017-09-05
Supplement: 13040_2017_150_MOESM1_ESM.pdf [file 13040_2017_150_MOESM1_ESM.pdf]

## Additional file 1. Primers used for qRT-PCR.

| Name | Sequence (5' to 3') |
|------|---------------------|
|------|---------------------|

### Reference genes

|        |                        |
|--------|------------------------|
| cysG-1 | taaccagcgcgtcagcgaag   |
| cysG-2 | catgagcggtagcgggtcaa   |
| idnT-1 | ggcgtcgcgctgcttctat    |
| idnT-2 | aggacggcctgtgcatccat   |
| hcaT-1 | atccgtccgacgattcag     |
| hcaT-2 | ccgtaataggccgcatgt     |
| ihfB-1 | gcatatggcctcgactcttg   |
| ihfB-2 | attacgtccggtacgtggtg   |
| ssrA-1 | ggcaagcgaatgtaaagactga |
| ssrA-2 | ccgctccgaaattccta      |
| rrsA-1 | agagcaagcggacctcataa   |
| rrsA-2 | gtattcaccgtggcattctg   |

### LexA-dependent genes

|        |                     |
|--------|---------------------|
| ftsK-1 | tgaactggcgtcttacgg  |
| ftsK-2 | agcgttgctgctgtgtct  |
| dinG-1 | ggctcgcgcatcact     |
| dinG-2 | tccgcttctgaatctcc   |
| cho-1  | gcagaccatcgctgatga  |
| cho-2  | agcgtagcgcgatgttct  |
| yebG-1 | atacggcggatctgctg   |
| yebG-2 | attcagcaccgacgacct  |
| uvrD-1 | cgcatatctgcaacct    |
| uvrD-2 | tcaccgacgatcatcact  |
| uvrB-1 | cgaggaacacggaattac  |
| uvrB-2 | cacattatccggctcaac  |
| recN-1 | catccgggtggtgaattgt |
| recN-2 | agttgattcggcaggtg   |
| polB-1 | cgcaacgagccatcatcag |
| polB-2 | catgaggcggcacattac  |

### Randomly selected genes

|        |                      |
|--------|----------------------|
| ahpC-1 | ctgaaggcattggccgtgac |
| ahpC-2 | ccagagacggagccagagtt |
| can-1  | ggattgatgttccgacagt  |
| can-2  | gtgtgaatgaccaggttgac |
| cspE-1 | cacttctctgcaatccagac |
| cspE-2 | gctgacctcagcaagagtt  |
| cyoA-1 | ggcattgctaccgtgaatga |
| cyoA-2 | agacgcggaatgaagaagga |
| gatY-1 | tctggcgtgcgctcagtcac |
| gatY-2 | cgctcgcgctgacatcaa   |
| gatZ-1 | tgaatctgaaggcgtggac  |
| gatZ-2 | agctgatgaggattgctga  |
| map-1  | cgagctggatcgcatctgta |
| map-2  | ttcggatagccgtgatagcc |
| sodA-1 | tggcggtcacgtaaccaca  |
| sodA-2 | tcaacggagccgaagtcacg |
| ubiD-1 | ccacgattctcgggtcagtc |
| ubiD-2 | tcggcttgggtccacgtag  |
| yajC-1 | ccacagcagaagcgcaccaa |
| yajC-2 | aaccaggccaccgttcgtca |
| yggX-1 | acatgatgaatgccgagcac |
| yggX-2 | ttgaccatctcctgctcaag |
